# Supplementary material for: Can nudge-interventions address health service overuse and underuse? Protocol for a systematic review
Source: PubMed Central journal article supplement — BMJ Open. 2019 Jun 24;9(6):e029540. doi: 10.1136/bmjopen-2019-029540 (PMC6597741; doi:10.1136/bmjopen-2019-029540), 2019-06-24
Supplement: bmjopen-2019-029540supp001.pdf [file bmjopen-2019-029540supp001.pdf]

## Supplementary appendix 1

### Row 1: Nudge-intervention terms

Decision Making, Computer-Assisted/ or Medical Records Systems, Computerized/ or Medical Order Entry Systems/ OR exp electronic health records/ OR Electronic Prescribing/ OR ((doctor\* or GP or GPs or "general practitioner\*" or registrar\* OR intern\* or medical or pharm\* or radiolog\* or physician\* or patholog\* or nurs\*) adj3 (order\* or form\* or request\* or prescri\*)),tw. OR ((Medication\* or test\* or scan\* or imaging or laboratory) adj2 (order\* or form\* or request\*)),tw. OR medication alert system\*.tw. OR electronic health record\*.tw OR electronic medical record\*.tw. OR default\*.tw OR "accountable justification".tw OR "active choice" OR "public commitment" OR pre-commitment.tw OR medication system\*.tw OR (computerized provider order entry or CPOE).tw OR electronic request form\*.tw. OR nudge\*.tw. OR "choice architecture".tw OR (behavi\* adj1 economics).tw. OR (behavi\* adj1 insight\*).tw. OR nudging.tw. OR "Forms and Records Control"/

AND

### Row 2: Overuse or underuse of health service terms

Clinical Laboratory Techniques/ OR Diagnostic Imaging/ OR "Quality of Health Care"/ OR deprescriptions/ OR (influence\* adj2 decision\*).tw. OR Choice Behavior/ OR ((inappropriate\* or unnecessary! or misuse OR underuse OR overuse) adj3 (test\* or screening OR imaging or prescri\* or prescription\* or laboratory)).tw. OR ((clinical or doctor\* or physician\* or nurs\*) adj2 practice pattern\*).tw. OR ((medication\* or prescribing or prescription\*) adj2 error\*).tw. OR test ordering pattern\*.tw. OR ((over or under or inappropriate) adj2 (prescri\* or order\*)),tw. OR Clinical Competence/ OR Unnecessary Procedures/ OR Inappropriate Prescribing/ OR exp Medication Errors/ OR health services misuse/ or medical overuse/ OR practice patterns, nurses'/ or practice patterns, physicians'/ OR Clinical Decision-Making/ OR practice guideline/

### Example of Medline strategy:

(Decision Making, Computer-Assisted/ OR Medical Records Systems, Computerized/ OR Medical Order Entry Systems/ OR exp electronic health records/ OR Electronic Prescribing/ OR ((doctor\* OR GP OR GPs OR general practitioner\* OR registrar\* OR intern\* OR medical OR pharm\* OR radiolog\* OR physician\* OR patholog\* OR nurs\*) ADJ3 (order\* OR form\* OR request\* OR prescri\*)),ti,ab. OR ((Medication\* OR test\* OR scan\* OR imaging OR laboratory) ADJ2 (order\* OR form\* OR request\*)),ti,ab. OR medication alert system\*.ti,ab. OR electronic health record\*.ti,ab. OR electronic medical record\*.ti,ab. OR default\*.ti,ab. OR accountable justification.ti,ab. OR active choice OR public commitment OR pre-commitment.ti,ab. OR medication system\*.ti,ab. OR (computerized provider order entry OR CPOE).ti,ab. OR electronic request form\*.ti,ab. OR nudge\*.ti,ab. OR choice architecture.ti,ab. OR (behavi\* ADJ1 economics).ti,ab. OR (behavi\* ADJ1 insight\*).ti,ab. OR nudging.ti,ab. OR Forms and Records Control/)

AND

(Clinical Laboratory Techniques/ OR Diagnostic Imaging/ OR Quality of Health Care/ OR deprescriptions/ OR (influence\* ADJ2 decision\*).ti,ab. OR Choice Behavior/ OR ((inappropriate\* OR unnecessary! OR misuse OR underuse OR overuse) ADJ3 (test\* OR screening OR imaging OR

prescrib\* OR prescription\* OR laboratory)).ti,ab. OR ((clinical OR doctor\* OR physician\* OR nurs\*) ADJ2 practice pattern\*).ti,ab. OR ((medication\* OR prescribing OR prescription\*) ADJ2 error\*).ti,ab. OR test ordering pattern\*.ti,ab. OR ((over OR under OR inappropriate) ADJ2 (prescrib\* OR order\*).ti,ab. OR Clinical Competence/ OR Unnecessary Procedures/ OR Inappropriate Prescribing/ OR exp Medication Errors/ OR health services misuse/ OR medical overuse/ OR practice patterns, nurses'/ OR practice patterns, physicians'/ OR Clinical Decision-Making/ OR practice guideline/)
